# Supplementary material for: Broadband photoelectric tunable quantum dot based resistive random access memory
Source: Royal Society of Chemistry journal article supplement (doi:10.1039/c9tc06230k), 2020-01-01
Supplement: c9tc06230k1.pdf [file c9tc06230k1.pdf]

Electronic Supplementary Material (ESI) for Journal of Materials Chemistry C .  
This journal is © The Royal Society of Chemistry 2019

## Supplementary Materials for

### Broadband Photoelectric Tunable Quantum Dot Resistive Random Access Memory

Zhiliang Chen,<sup>a</sup> Yu Yu,<sup>a</sup> Lufan Jin,<sup>a</sup> Yifan Li,<sup>a</sup> Qingyan Li,<sup>a</sup> Tengting Li,<sup>a</sup> Jie Li,<sup>a</sup> Hongliang Zhao,<sup>a</sup> Yating Zhang,<sup>a,†</sup> Haitao Dai,<sup>b</sup> Jianquan Yao<sup>a</sup>

<sup>a</sup>1Key Laboratory of Opto-Electronics Information Technology (Tianjin University), Ministry of Education, School of Precision Instruments and Opto-Electronics Engineering, Tianjin University, Tianjin, 300072, China;

<sup>b</sup>2Tianjin Key Laboratory of Low Dimensional Materials Physics and Preparing Technology, School of Science, Tianjin University, Tianjin, 300072, China;

† To whom correspondence should be addressed: [yating@tju.edu.cn](mailto:yating@tju.edu.cn)

#### 1. Synthesis of PbS quantum dots

**Chemicals:** Lead oxide (PbO, 99.99% pure from Aladdin), octadecene (ODE, 90% pure from Acros organics), oleic acid (OA, 80–90% pure from Aladdin), bis(trimethylsilyl) sulfide ((TMS)<sub>2</sub>S 95% pure from Acros organics), methanol, toluene, acetone, and n-hexane were used during the synthesis process.

**Methods:** Firstly, 1.34 g PbO, 3.8 mL OA and 37.5 mL ODE were taken in 100 mL 3-necked round bottom flask, and the mixture was stirred under Nitrogen environment for 1 h at 90 °C to remove oxygen and moisture. Secondly, heated at 120 °C for about 10 min to get clear solution. Third, increase the temperature to 150 °C and 18 mL of bis(trimethylsilyl) sulfide solution (630 μL (TMS)<sub>2</sub>S in 20 mL ODE) was quickly injected to the reaction solution. After 5 s, the reaction solution was cooled in cold water. Forth, the reactant was washed three times with methanol, n-hexane, and acetone. Lastly, redissolve and store the PbS quantum dots in toluene solution.

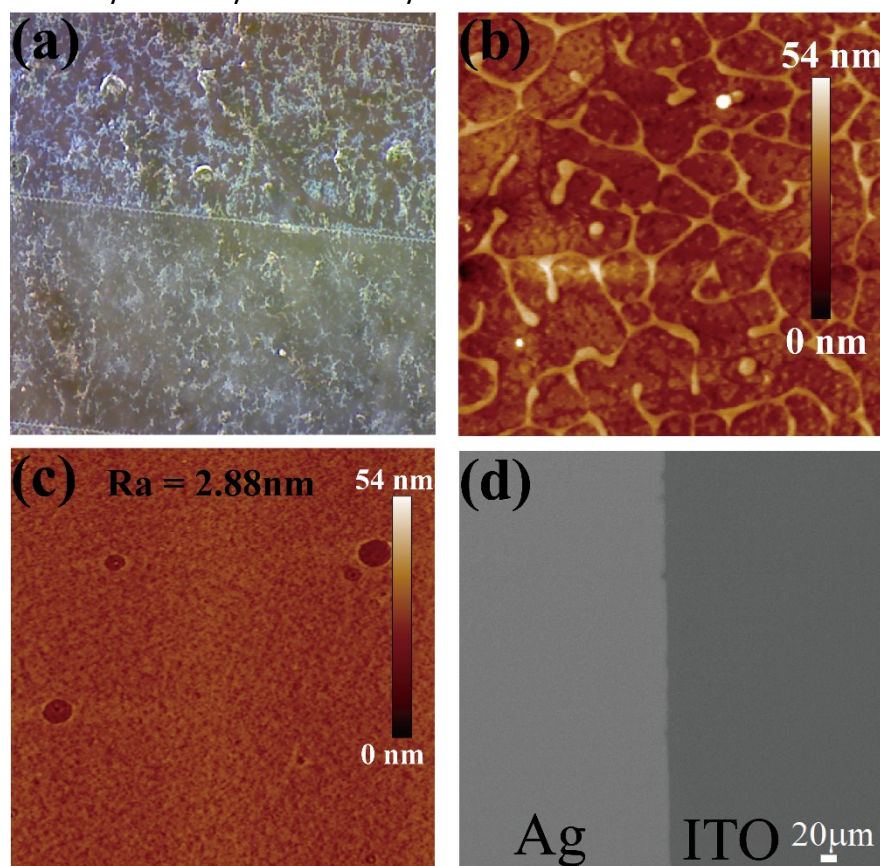

Figure S1. Surface morphologies of the films formed by the mixture with different concentration. (a) Only 15mg/ml PbS QDs. The surface of film is rough and the agglomeration is very serious. (b) The concentration ratio is 5:1 (the concentration of PbS QDs and PMMA was 10mg/ml and 2mg/ml, respectively). It still did not form a uniform membrane. (c) The concentration ratio is 1:1 (the concentration of PbS QDs and PMMA were all 5mg/ml). The film was smooth but PbS QDs were agglomerative. (d) The surface SEM image of the spin coated film. The concentration ratio is 1:5 (the concentration of PbS QDs and PMMA was 2mg/ml and 10mg/ml, respectively). the film was very smooth and the average roughness is 1.41nm (Figure 1(g))

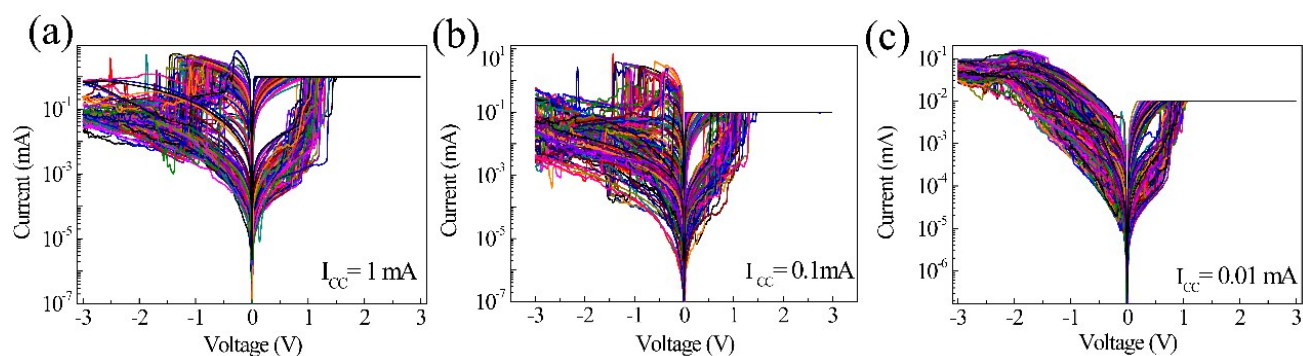

Figure S2. I-V curves of 100 cycle sweeps in different compliance currents of the device.

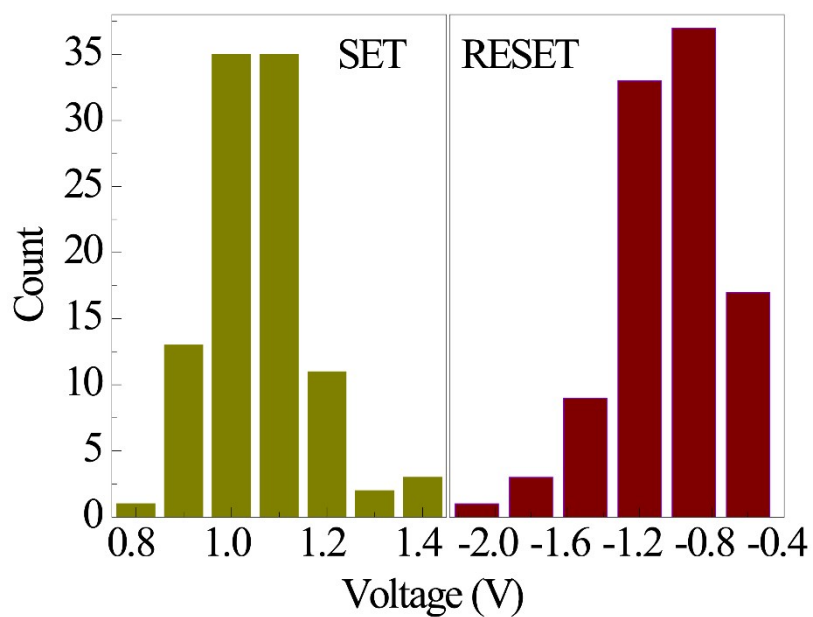

Figure S3. Statistical distribution of the  $V_{\text{SET}}$  and  $V_{\text{RESET}}$ . The results are obtained from I–V sweep mode of 100 cycles.

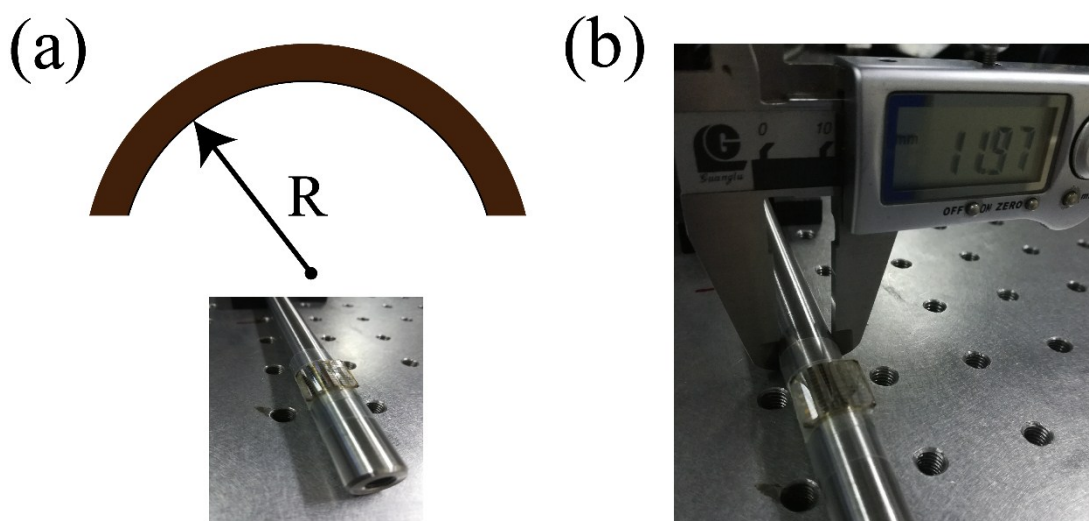

Figure S4. Schematic diagram of bending test.

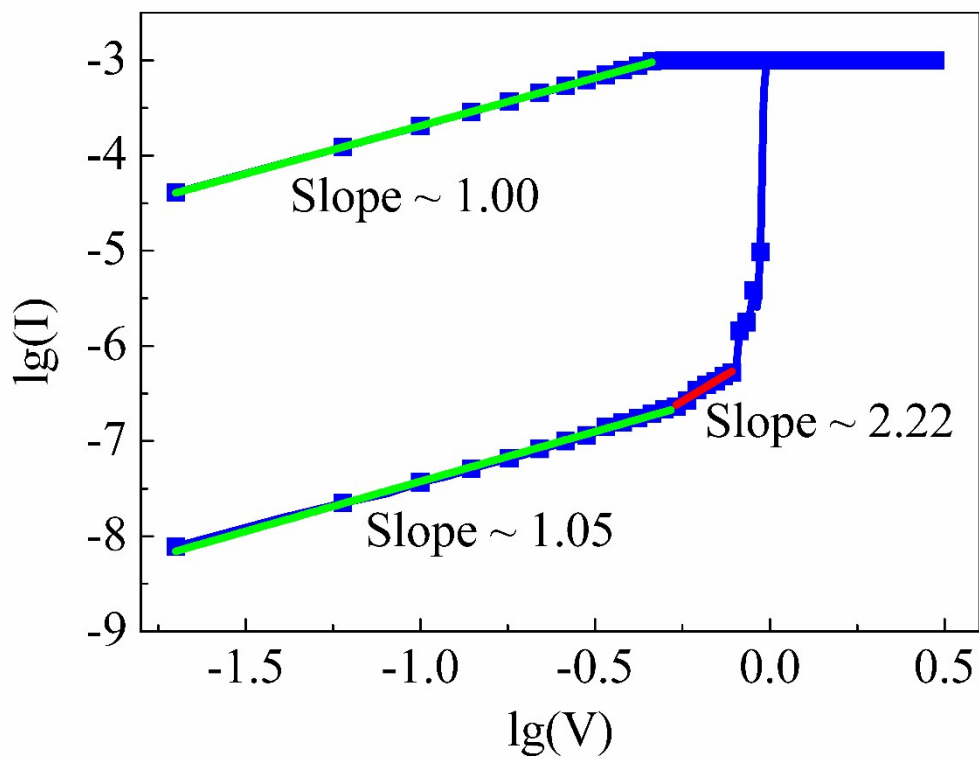

Figure S5. Log I-log V curves in the positive bias region

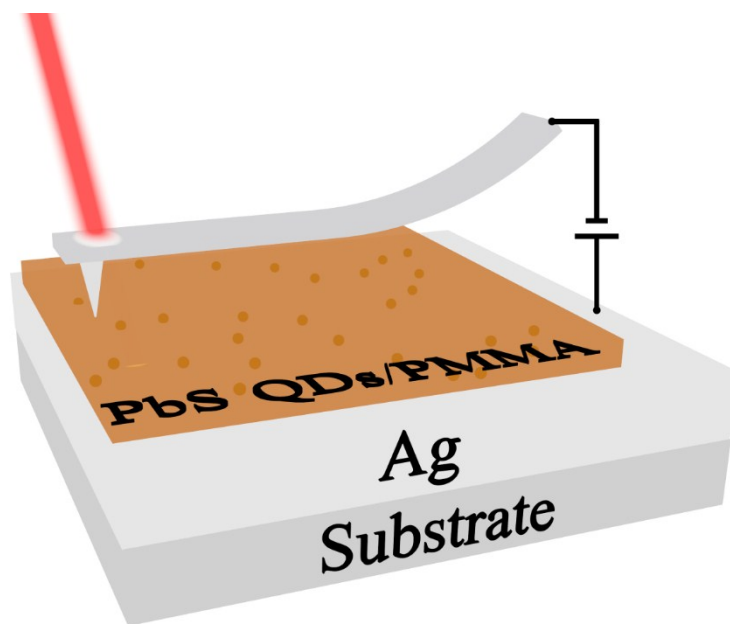

Figure S6. Schematic diagram of CAFM measurement. According to the Guidebook of CAFM, the test base is the positive electrode.
